# Supplementary material
Source: publisher figshare collection journal article supplement (https://acs.figshare.com/ndownloader/files/4402276)

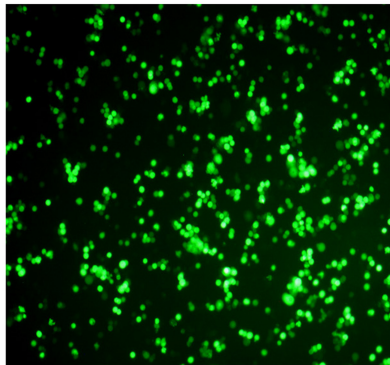

**SW480-EGFP**

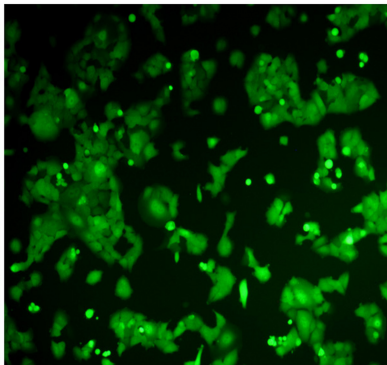

**SW480-EGFP/PRL-3<sup>-</sup>**

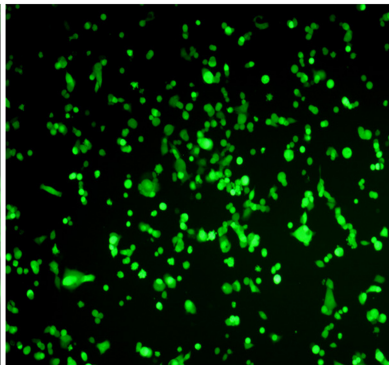

**24h after stathmin overexpression  
in SW480-EGFP/PRL-3<sup>-</sup>**

Supplement: Supplementary file 1 [file 4402276]
